# Supplementary material for: A LAMP-SNP Assay Detecting C580Y Mutation in Pfkelch13 Gene from Clinically Dried Blood Spot Samples
Source: PubMed Central journal article supplement — Korean J Parasitol. 2021 Feb 19;59(1):15–22. doi: 10.3347/kjp.2021.59.1.15 (PMC7939969; doi:10.3347/kjp.2021.59.1.15), 2021-02-19
Supplement: kjp-59-1-15-suppl.pdf [file kjp-59-1-15-suppl.pdf]

**Supplementary Table S1.** Primer sequences used for LAMP-SNP assay

| Assay                    | Primers    | Sequence (5'-3')                                        |
|--------------------------|------------|---------------------------------------------------------|
| PCR for C580Y detection  | K13c.621F  | GGAATTAAGTGATGCTAGTGA                                   |
|                          | K13c.2129R | GGGCCAAGCTGCCATTCATTTG                                  |
|                          | K13c.1344F | AGGTGGATTTGATGGTGTAGAA                                  |
| LAMP-SNP C580Y detection | F3         | GAAAGCATGGGTAGAGGTG                                     |
|                          | B3         | TATTGTTCAACGGAATC                                       |
|                          | BIP        | CCATATGCCTTATTAGAAG-CTCCAACAACATATATTTGATTAAGG          |
|                          | FIP        | ACCATTAGTTCACCAATGAC-CCCCTAGATCATCAGCTATGc <sup>a</sup> |

<sup>a</sup>3' end of F2 region of FIP primer is contained mutant nucleotide (bold letter) and lowercase letter c is mismatch nucleotide.

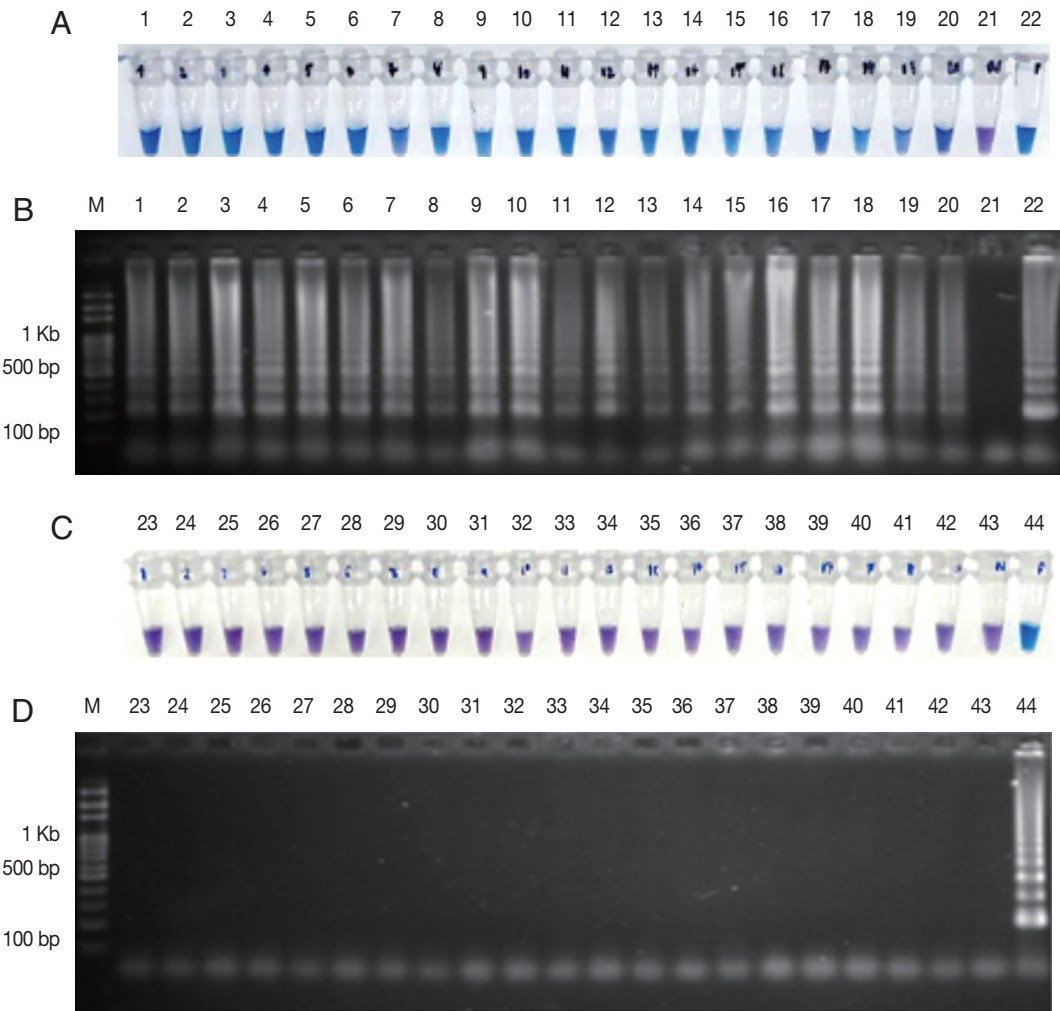

**Supplementary Fig. S1.** Evaluation of clinical specimens by LAMP-SNP assay. (A) and (C); Amplification products of LAMP-SNP assay using HNB as a visual indicator. (B) and (D); Agarose gel electrophoresis of the LAMP-SNP products. (A) and (B); Labels: 1-20,23 represent C580Y mutation. (C) and (D); 23-42 were identified as *PfKelch13* C580 (wildtype). Labels: 21 and 43 were negative control. Label 44 was a plasmid that contained *PfKelch13*<sup>C580Y</sup> as positive control.
